# Supplementary material
Source: publisher figshare collection journal article supplement (https://sage.figshare.com/ndownloader/files/23101457)
Supplement: Supplementary file [file 23101457]

## PARTICIPANT INFORMATION

- 1) Level of training – multiple choice

PGY1   PGY2   PGY3   PGY4   PGY5

- 2) Size of the program in terms of residents per year - multiple choice

1-3   4-6   7-9   10+

- 3) Province of training – dropdown list

AB   BC   MB   NL   NS   ON   QC   SK

## IMPACT OF COVID-19 ON TRAINING

- 4) Rate the level of disruption due to COVID-19 on each of the following aspects of your training.  
(rating scale)

- a. Day-time schedule
- b. After-hour/call schedule
- c. Volume of daytime cases
- d. Volume of after-hours cases
- e. Teaching rounds
- f. Disruption of internal and external assessments (e.g. departmental OSCEs, MCCQE and Royal College Exams)
- g. Fellowship planning
- h. Electives
- i. Research activities (e.g. conferences)
- j. Vacation/Travel
- k. Other (please specify)

Following options for each:

None at all

Little bit

Moderate

A lot

A great deal

- 5) Have you been redeployed? (multiple choice)
- a. Yes – within radiology department
  - b. Yes – outside of radiology department
  - c. Not yet – but may be redeployed in future
  - d. No – exempt from redeployment

- 6) What is your level of stress/anxiety regarding work-related COVID-19 exposure? (rating)

None   Low   Moderate   High   Extreme

- 7) What did your program utilize to circumvent these? Select all that apply (multiple choice)
- a. Virtual teaching rounds
  - b. Virtual/phone readout
  - c. Ability to report from home
  - d. Change in schedules to allow staying home
  - e. Change in schedules to allow social distancing at work
  - f. Offering additional self-study resources
  - g. Other (please specify)
- 8) Please select which of the following web conference software you have come across during this pandemic and your level of satisfaction with each. (rating scale)
- a. Zoom
  - b. GotoMeeting
  - c. Google Meet/Hanout
  - d. Cisco Webex
  - e. Skype
  - f. Microsoft Teams
  - g. GotoWebinar
  - h. Other

Following choices for each:

Did not use

Very dissatisfied

Somewhat dissatisfied

Neutral

Somewhat satisfied

Very satisfied

#### COVID-19 PREPAREDNESS – KNOWLEDGE ACQUISITION

- 9) How important is each of following factors when you are choosing educational material on COVID-19? (Rating scale)
- a. Credibility of the source
  - b. Medium of the source (podcast, video, etc.)
  - c. Time commitment required
  - d. Cost of access
  - e. Ease of access (e.g. readable on mobile device)
  - f. Date of publication

Following choices for each:

Not at all important

Slightly important

Important

Fairly important

Very important

10) Rank each of the following educational resources in terms of their value for radiological manifestations of COVID-19 (ranking). Please select N/A if you do not have access to it. (rating scale)

- a. Primary research papers
- b. Review papers
- c. Published society guidelines
- d. Web tools (eg. researchassistant.nl)
- e. Video talks/webinars
- f. Podcasts
- g. Commercial Media (news, articles)
- h. Social Media
- i. StatDx/Radprimer

Following options for each:

None at all

Little bit

Moderate

A lot

A great deal

N/A
